# Supplementary material
Source: publisher figshare collection journal article supplement (https://acs.figshare.com/ndownloader/files/4714918)
Supplement: Supplementary file 1 [file 4714918]

## **Epitaxial Supramolecular Assembly of Fullerenes Formed by Using Coronene Template on Au(111) Surface in Solution**

Soichiro Yoshimoto,<sup>\*,†,||</sup> Eishi Tsutsumi,<sup>†</sup> Ryuji Narita,<sup>†</sup> Yasujiro Murata,<sup>‡</sup> Michihisa Murata,<sup>‡</sup> Koichi Fujiwara,<sup>‡</sup>  
Koichi Komatsu,<sup>‡,+</sup> Osamu Ito,<sup>§</sup> Kingo Itaya<sup>\*,†</sup>

<sup>†</sup>*Department of Applied Chemistry, Graduate School of Engineering, Tohoku University, 6-6-07 Aoba, Sendai 980-8579, Japan.*

<sup>‡</sup>*Institute for Chemical Research, Kyoto University, Uji, Kyoto 611-0011, Japan.* <sup>§</sup>*Institute of Multidisciplinary Research for Advanced Materials, Tohoku University, Katahira, Aoba-ku, Sendai 980-8577, Japan.*

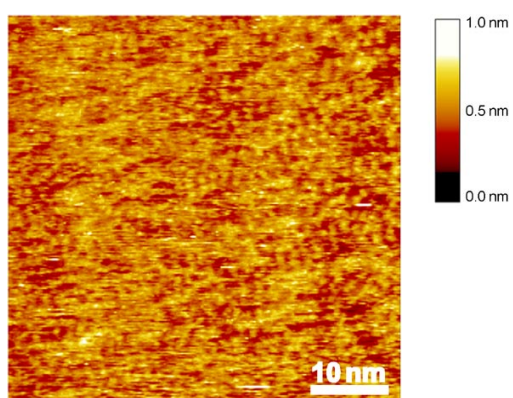

**Figure S1.** Typical large-scale ( $50 \times 50 \text{ nm}^2$ ) STM image of opencage  $\text{C}_{60}$  derivative adlayer formed on the coronene-modified Au(111) surface in 0.1 M  $\text{HClO}_4$ . Tip potential and tunneling current were 0.35 V and 2.0 nA.

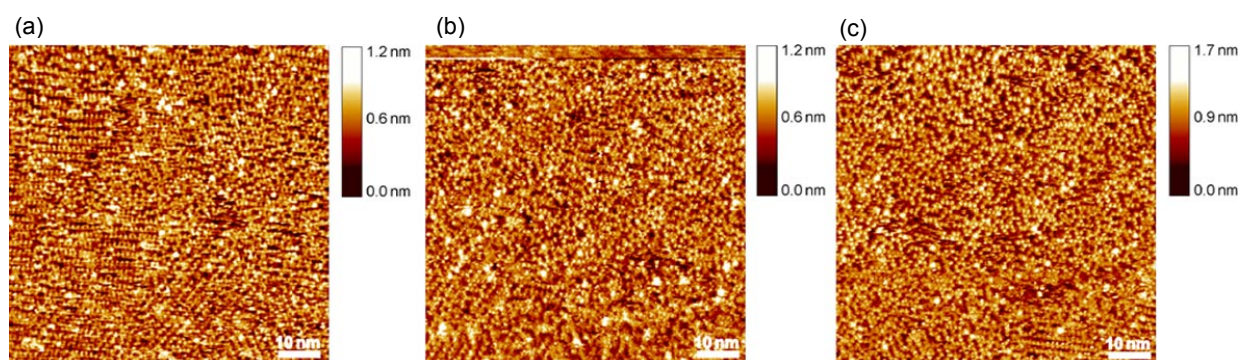

**Figure S2.** Typical large-scale ( $75 \times 75 \text{ nm}^2$ ) STM images of  $\text{C}_{70}$  adlayer formed on the coronene-modified Au(111) surface in 0.1 M  $\text{HClO}_4$ . The electrode potential was held at (a) 0.53 V, (b) and (c) 0.29 V vs RHE. Tip potential and tunneling current were 0.46 V and 0.15 nA.

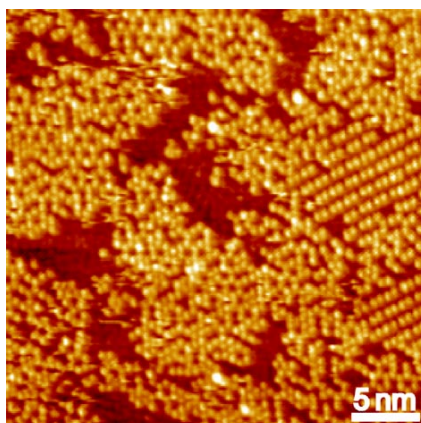

**Figure S3.** Typical large-scale (40 x 40 nm<sup>2</sup>) STM image of C<sub>130</sub> adlayer formed on the coronene-modified Au(111) surface in 0.1 M HClO<sub>4</sub>. Tip potential and tunneling current were 0.35 V and 1.0 nA
